# Supplementary material for: A novel way for the determination of the acid values of edible oils using a phthalocyanine derivative
Source: Royal Society of Chemistry journal article supplement (doi:10.1039/c8ay01079j), 2018-01-01
Supplement: c8ay01079j1.pdf [file c8ay01079j1.pdf]

Supplementary materials

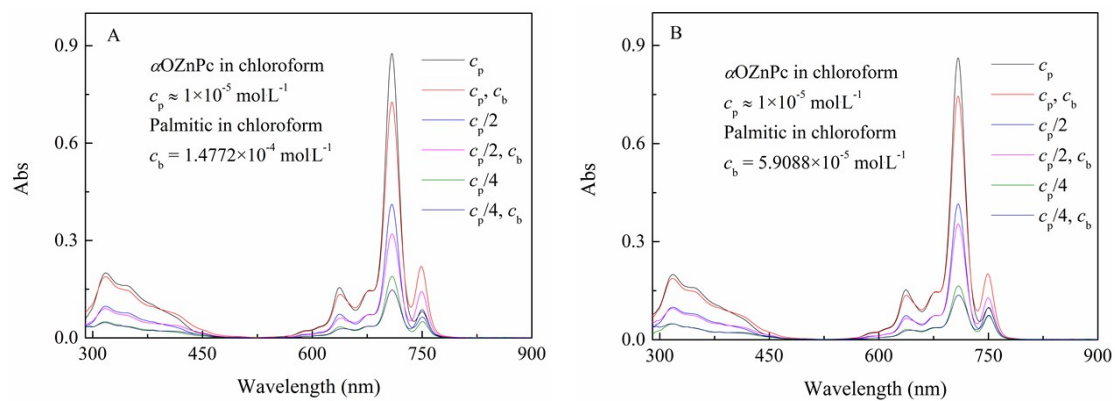

S1. UV-vis spectra of concentration-different  $\alpha$ OZnPc in chloroform with and without palmitic acid, which has two concentrations  $1.4772 \times 10^{-4} \text{ mol/L}$  (a) and  $5.9088 \times 10^{-5} \text{ mol/L}$  (b).
